# Supplementary material for: Overexpression of KDM5B/JARID1B is associated with poor prognosis in hepatocellular carcinoma
Source: PubMed Central journal article supplement (PMC6188148; doi:10.18632/oncotarget.26144), 2018-09-28
Supplement: oncotarget-09-34320-s001.pdf [file oncotarget-09-34320-s001.pdf]

## Overexpression of KDM5B/JARID1B is associated with poor prognosis in hepatocellular carcinoma

### SUPPLEMENTARY MATERIALS

Supplementary Table 1: siRNA sequences

| siRNA name | Sequence                                                                     |
|------------|------------------------------------------------------------------------------|
| siEGFP     | Sense: 5' GCAGCACGACUUCUUCAAGTT 3'<br>Antisense: 5' CUUGAAGAAGUCGUGCUGCTT 3' |
| siKDM5B#1  | Sense: 5' CAGUGAAUGAGCUCCGGCATT 3'<br>Antisense: 5' UGCCGGAGCUCAUUCACUGTT 3' |
| siKDM5B#2  | Sense: 5' GGAAUAUGGAGCUGACAUUTT 3'<br>Antisense: 5' AAUGUCAGCUCCAUAUUCCTT 3' |

Supplementary Table 2: Primer sequences for real-time PCR

| Gene name                    | Primer sequence                 |
|------------------------------|---------------------------------|
| GAPDH (housekeeping gene) -f | 5' GCAAATTCATGGCACCGTC 3'       |
| GAPDH (housekeeping gene) -r | 5' TCGCCCCACTTGATTTTGG 3'       |
| SDH (housekeeping gene) -f   | 5' TGGGAACAAGAGGGCATCTG 3'      |
| SDH (housekeeping gene) -r   | 5' CCACCACTGCATCAAATTCATG 3'    |
| KDM5B -f                     | 5' ATGCTCAAAGGAATTTGGCAGTG 3'   |
| KDM5B -r                     | 5' CATCACTGGCATGTTGTTCAAATTC 3' |
| E2F1 -f                      | 5' GCTGGACCACCTGATGAATATC 3'    |
| E2F1 -r                      | 5' TCTGCAATGCTACGAAGGTCCTG 3'   |
| E2F2 -f                      | 5' TGGCAACTTTAAGGAGCAGACAG 3'   |
| E2F2 -r                      | 5' GGGCACAGGTAGACTTCGATGG 3'    |
